# Supplementary material for: Application of Geomechanical Classification Systems in a Tourist Mine for Establishing Strategies within 3G’s Model
Source: MDPI journal article supplement (doi:10.3390/heritage6060245), 2023-06-06
Supplement: s1 [file s1]

## SUPPLEMENTARY MATERIALS

Article

### Application geomechanical classification systems in a tourist mine for establishing strategies within 3G's model.

Supplementary Materials:

Table S1. RMR geomechanical classification [53].

| 1                 | Rock Matrix                   | Point load test             | >10        | 10 - 4              | 4 - 2               | 2-1                 | Simple Compression  |     |    |
|-------------------|-------------------------------|-----------------------------|------------|---------------------|---------------------|---------------------|---------------------|-----|----|
|                   | Resistance (MPa)              | Simple Compression          | >250       | 250 -100            | 100 -50             | 50 - 25             | 25-5                | 5-1 | <1 |
|                   | Score                         |                             | 15         | 12                  | 7                   | 4                   | 2                   | 1   | 0  |
| 2                 | RQD                           |                             | 90%-100%   | 75%-90%             | 50%-75%             | 25%-50%             | <25%                |     |    |
|                   | Score                         |                             | 20         | 17                  | 13                  | 6                   | 3                   |     |    |
| 3                 | Separation between diaclasses |                             | >2m        | 0.6-2m              | 0.2-0.6m            | 0.06-0.2m           | <0.06m              |     |    |
|                   | Score                         |                             | 20         | 15                  | 10                  | 8                   | 5                   |     |    |
| 4                 | State of the discontinuities  | Length of the discontinuity | <1m        | 1-3m                | 3-10m               | 10-20m              | >20m                |     |    |
|                   |                               | Score                       | 6          | 4                   | 2                   | 1                   | 0                   |     |    |
|                   |                               | Gap                         | None       | <0.1mm              | 0.1-1.0mm           | 1-5mm               | >5mm                |     |    |
|                   |                               | Score                       | 6          | 5                   | 3                   | 1                   | 0                   |     |    |
|                   |                               | Roughness                   | Very Rough | Rough               | Slightly rough      | Undulate            | Soft                |     |    |
|                   |                               | Score                       | 6          | 5                   | 3                   | 1                   | 0                   |     |    |
|                   |                               | Filler                      | None       | Hard-filled<br><5mm | Hard-filled<br>>5mm | Soft-filled<br><5mm | Soft-filled<br>>5mm |     |    |
|                   |                               | Score                       | 6          | 5                   | 3                   | 1                   | 0                   |     |    |
|                   |                               | Disturbance                 | Unaltered  | Slightly altered    | Moderately altered  | Very altered        | Decomposed          |     |    |
|                   |                               | Score                       | 6          | 5                   | 3                   | 1                   | 0                   |     |    |
| 5                 | Groundwater                   | Overall status              | Dry        | Slightly humid      | Humid               | Dripping            | Flowing water       |     |    |
|                   | Score                         |                             | 15         | 10                  | 7                   | 4                   | 0                   |     |    |
| Rock Mass Quality |                               |                             |            |                     |                     |                     |                     |     |    |
|                   | Grade                         |                             | I          | II                  | III                 | IV                  | V                   |     |    |
|                   | RMR                           |                             | 100 – 81   | 80 – 61             | 60 – 41             | 40 – 21             | <20                 |     |    |
|                   | Quality                       |                             | Very Good  | Good                | Normal              | Poor                | Very Poor           |     |    |

**Table S2.** Rock quality according to the Q Index [82].

| Q-Barton   | Rock Massif Quality |
|------------|---------------------|
| 0.001–0.01 | Exceptionally poor  |
| 0.01–0.1   | Extremely poor      |
| 0.1–1      | Very poor           |
| 1–4        | Poor                |
| 4–10       | Fair                |
| 10–40      | Good                |
| 40–100     | Very good           |
| 100–400    | Extremely good      |
| 400–1000   | Exceptionally good  |

**Table S3.** Descriptions and ratings for the Jr, Jn, Ja y Jw parameters [82].

| Joint roughness number (Jr)                                         |                                                                                    | Value      |
|---------------------------------------------------------------------|------------------------------------------------------------------------------------|------------|
| (a) Rock wall contact and (b) Rock wall contact before 10 cm shear. | A. Discontinuos joints                                                             | 4          |
|                                                                     | B. Rough or irregular, undulating                                                  | 3          |
|                                                                     | C. Smooth, undulating                                                              | 2          |
|                                                                     | D. Slickensided, undulating                                                        | 1.5        |
|                                                                     | E. Rough or irregular, planar                                                      | 1.5        |
|                                                                     | F. Smooth, planar                                                                  | 1.0        |
|                                                                     | G. Slickensided, planar                                                            | 0.5        |
| (c) No rock wall contacts when sheared                              | H. Zone containing clay minerals thick enough to prevent rock wall contact         | 1.0        |
|                                                                     | J. Sandy, enough to prevent rock wall contact                                      | 1.0        |
| Joint set number (Jn)                                               |                                                                                    |            |
|                                                                     | A. Massive rock                                                                    | 0.5 – 1.0  |
|                                                                     | B. One family of joints                                                            | 2          |
|                                                                     | C. One family of joints with other occasional joints                               | 3          |
|                                                                     | D. Two families of joints                                                          | 4          |
|                                                                     | E. Two families of joints with other occasional joints                             | 5          |
|                                                                     | F. Three families of joints                                                        | 9          |
|                                                                     | G. Three families of joints with other occasional joints                           | 12         |
|                                                                     | H. Four or more families, highly fractured rock                                    | 15         |
|                                                                     | J. Crushed rock                                                                    | 20         |
| Joint alteration number (Ja)                                        |                                                                                    |            |
|                                                                     | Sound-walled joints                                                                | 0.75 – 1.0 |
|                                                                     | Slight alteration                                                                  | 2          |
|                                                                     | Clay alterations                                                                   | 4          |
|                                                                     | With gritty detritus                                                               | 4          |
|                                                                     | With pre consolidated clay detritus                                                | 6          |
|                                                                     | With unconsolidated clayey detritus                                                | 8          |
|                                                                     | With Expansive clay detritus                                                       | 8 – 12     |
|                                                                     | Rock and clay mylonites                                                            | 5 – 12     |
|                                                                     | Smooth clay mylonites                                                              | 5          |
|                                                                     | Coarse clayey mylonites                                                            | 10 – 20    |
| Joint water reduction factor (Jw)                                   |                                                                                    |            |
|                                                                     | A. Dry excavations or minor inflow, i.e. <5l/min. locally                          | 1.0        |
|                                                                     | B. Medium inflow or pressure occasional outwash of joint fillings                  | 0.66       |
|                                                                     | C. Large inflow or high pressure in competent rock with unfilled joints            | 0.5        |
|                                                                     | D. Large inflow or high pressure, considerable outwash of joint fillings           | 0.33       |
|                                                                     | E. Exceptionally high inflow or water pressure at blasting, decaying with time     | 0.2 – 0.1  |
|                                                                     | F. Exceptionally high inflow or water pressure continuing without noticeable decay | 0.1 – 0.05 |
